# Supplementary material
Source: publisher figshare collection journal article supplement (https://karger.figshare.com/ndownloader/files/38935250)
Supplement: Supplementary file 1 [file 38935250]

**Supplementary Table 2 – Characteristics of endoscopic treatment**

aData regarding 1 patient was not available

| Author, year | Number of patients treated with EVT or stent | Type of stent | | | Number of endoscopic devices – median (range) OR mean ± SD |
| --- | --- | --- | --- | --- | --- |
| Plastic stent – n (%) | Metal stent – n (%) | |
| Partially covered – n (%) | Fully covered – n (%) |
| **EVT studies** | | | | | |
| Mennigen, R. 2015 | 15 |  | | | 6.5 (1-18) |
| Min, Y. W. 2019 | 20 | 5 (2-12) |
| Schorsch, T. 2014 | 20 | 3 (1-15) |
| **Stent studies** | | | | | |
| Angulo, D.R. 2018 | 8 | 0 (0) | 0 (0) | 8 (100) | 1.5 (1-2) |
| Etxaniz, S. L. 2013 | 9 | 0 (0) | 0 (0) | 9 (100) | - |
| Feith, M. 2011 | 115 | 0 (0) | 0 (0) | 115 (100) | - |
| Freeman, R. K. 2015 | 45 | 26 (57.8) | 0 (0) | 19 (42.2) | - |
| Fumagali, U. 2018 | 12 | 12 (100) | | | - |
| Kauer, W. K. 2007 | 10 | 0 (0) | 0 (0) | 10 (100) | 1.4 ± NA |
| Leenders, B. J. M. 2013 | 10 | 0 (0) | 10 (100) | | 1 ± 0 |
| Schweigert, M. 2014 | 29 | 29 (100) | | | - |
| Wu, G. 2017 | 27 | 0 (0) | 0 (0) | 27 (100) | - |
| Kucukay, F. 2012 | 14 | 0 (0) | 2 (14.3) | 12 (85.7) | - |
| Lee, S. R. [] | 8 | 0 (0) | 0 (0) | 8 (100) | 2 ± NA |
| Milek, T. 2016 | 12 | 0 (0) | 12 (100) | | - |
| Al-issa, M. A [] | 15 | 0 (0) | 0 (0) | 15 (100) | 1.1 ± NA |
| Bohle, W. [] | 34 | 0 (0) | 34 (100) | | 2 (1-7) |
| Dai, Y. Y. [] | 22 | 22 (100) |  |  | 2 (NA) |
| Fernandez, A. 2015 | 14 | 0 (0) | 0 (0) | 14 (100) | 1 (1-2)a |
| Licht, E. 2015 | 31 | 0 (0) | 31 (100) | | - |
| Ma, H. 2018 | 7 | 0 (0) | 7 (100) | | - |
| Schubert, D. 2006 | 11 | 9 (81.8) | 0 (0) | 2 (18.2) | 1 ± 0 |
| **Double arm studies** | | | | | |
| Berlth, F. 2018  - EVT  - Stent | 34  77 | -  0 (0) | -  0 (0) | -  77 (100) | 3 (1-9)  1 (1-3) |
| Hwang, J.J. 2016  - EVT  - Stent | 7  11 | -  0 (0) | -  11 (100) | | 4 (2-10)  2 (1-4) |
| Schniewind, B. 2013  - EVT  - Stent | 17  12 | -  4 (33.3) | -  8 (66.7) | | -  - |
